# Supplementary material for: Rapid Evolutionary Adaptation to Diet Composition in Black Soldier Fly (<em>Hermetia illucens</em>)
Source: Preprints.org preprint supplement (doi:10.20944/preprints202308.1500.v1), 2023-08-22
Supplement: Supplementary file 3 [file supplementary]

Table S1: Raw data from estimating juvenile's dry mater content during a pilot trial

| Sample description | Tray weight (g) | Sample weight (g) | Weight after 105°C (Tray + sample, g) | Dry matter (%) |
|--------------------|-----------------|-------------------|---------------------------------------|----------------|
| Juveniles          | 3.12            | 45.32             | 16.50                                 | 30%            |
| Juveniles          | 3.13            | 61.06             | 21.07                                 | 29%            |
| Juveniles          | 3.32            | 52.58             | 19.40                                 | 31%            |
| Juveniles          | 3.13            | 53.69             | 19.32                                 | 30%            |
| Juveniles          | 3.14            | 57.46             | 20.05                                 | 29%            |
| Juveniles          | 3.13            | 43.15             | 16.18                                 | 30%            |
