# Supplementary figures and images for: Rapid Evolutionary Adaptation to Diet Composition in Black Soldier Fly (<em>Hermetia illucens</em>)
Source: Preprints.org preprint supplement (doi:10.20944/preprints202308.1500.v1), 2023-08-22

Frass fw (g/tray)

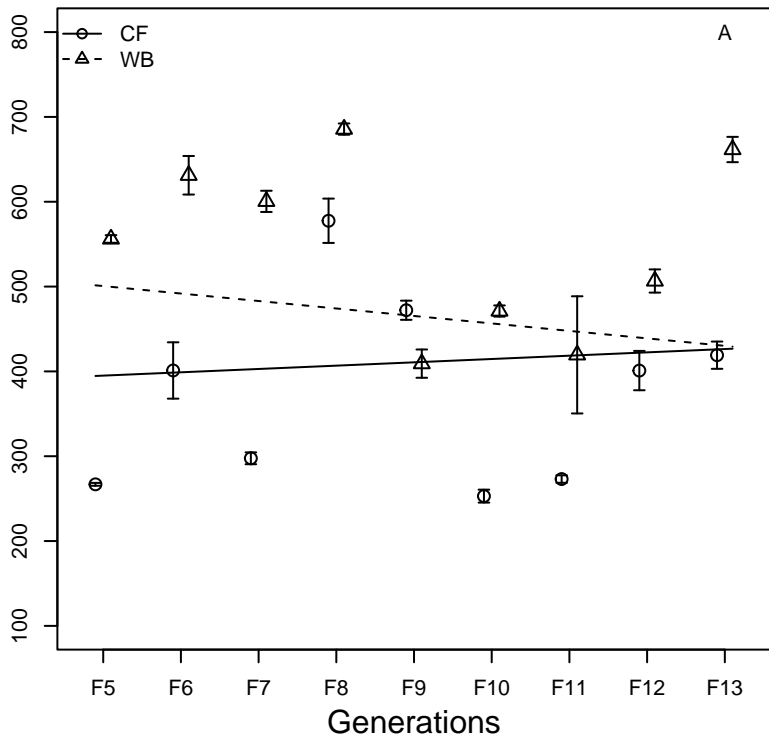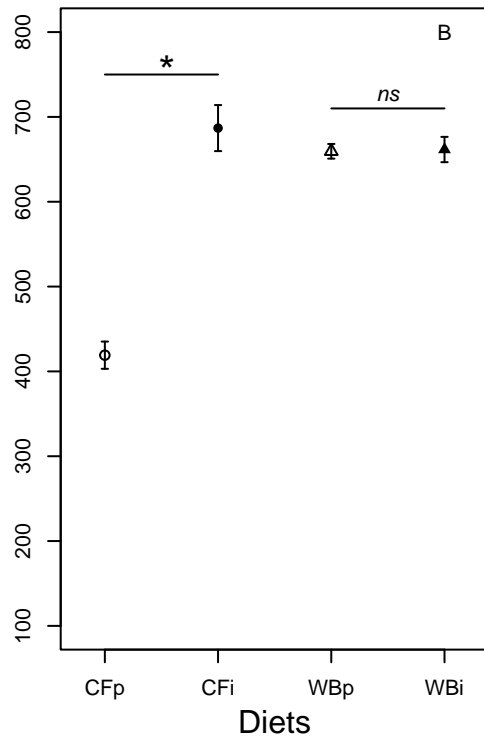

Supplement: Supplementary file 1 [file supplementary]

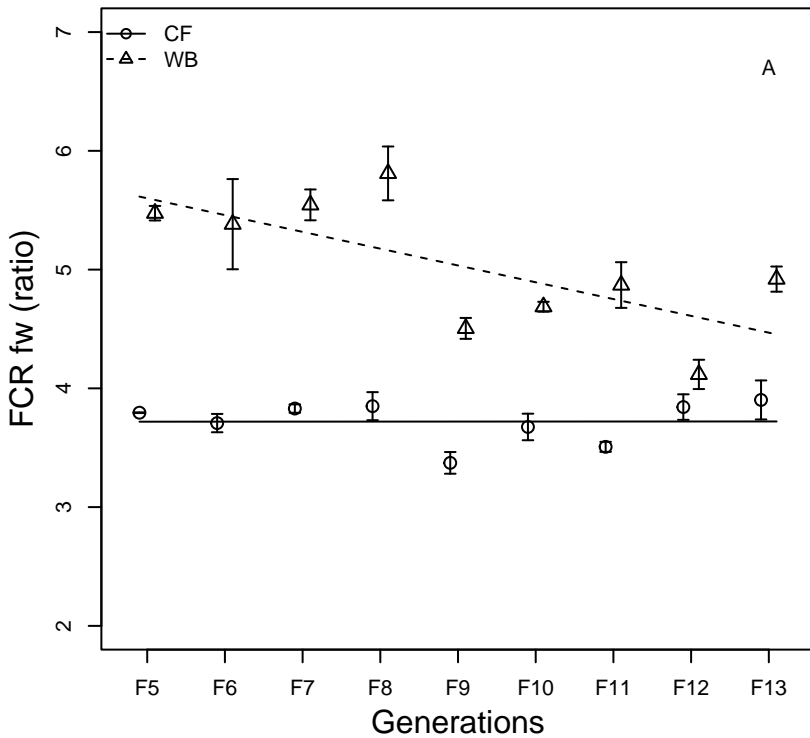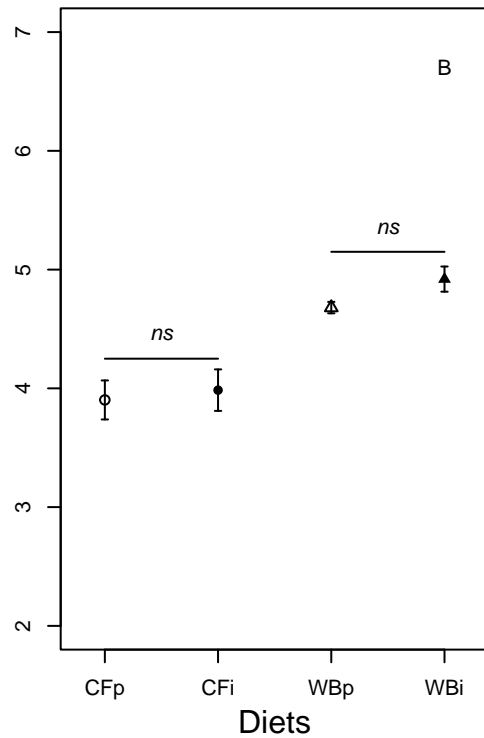

Supplement: Supplementary file 2 [file supplementary]

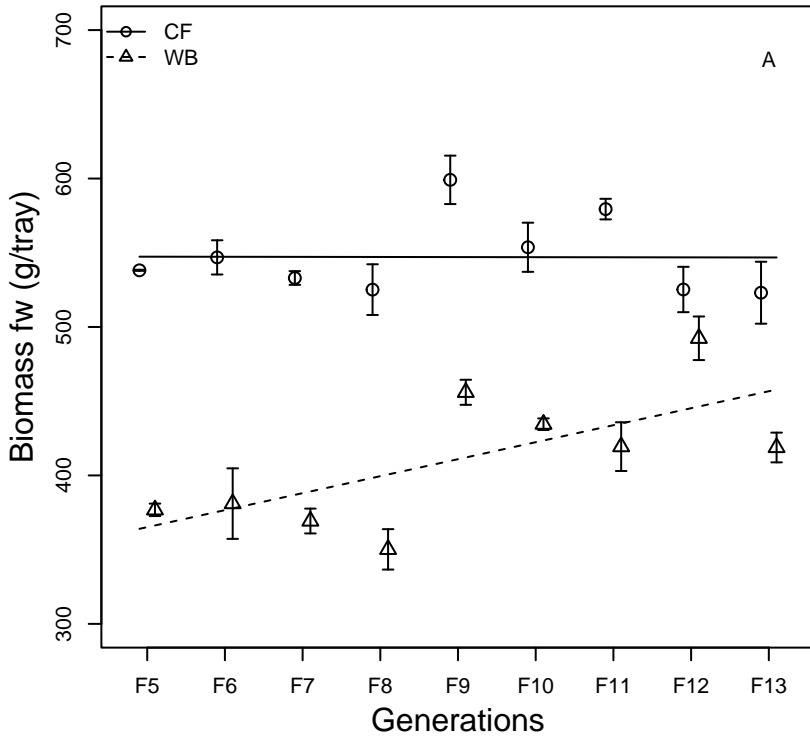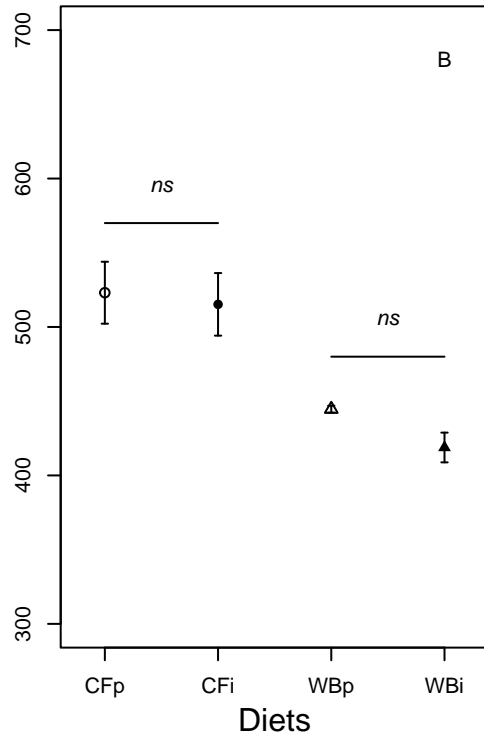

Supplement: Supplementary file 4 [file supplementary]
